# Supplementary material
Source: Springer Nature journal article supplement (https://www.springermedizin.de/resource/supplementary/12891_2008_948_MOESM7_ESM.pdf/9506770)

a

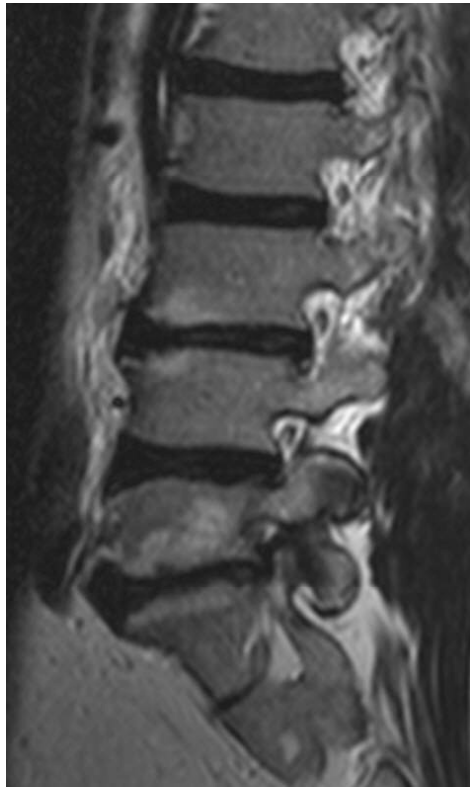

b

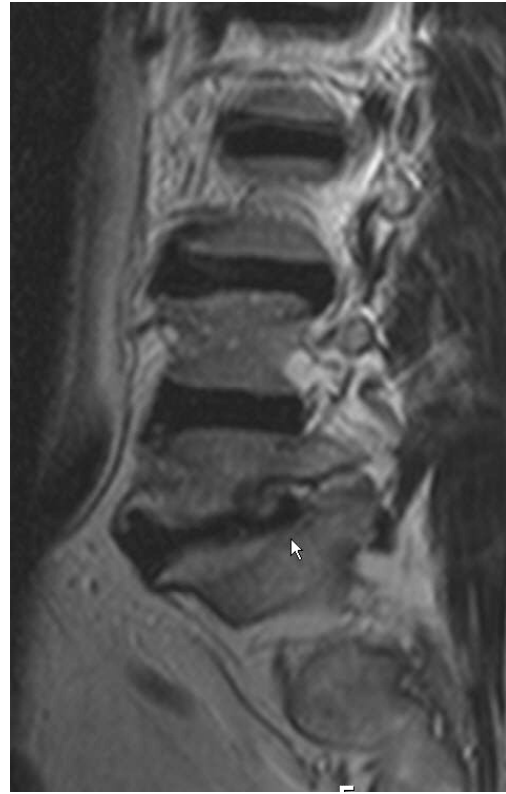

c

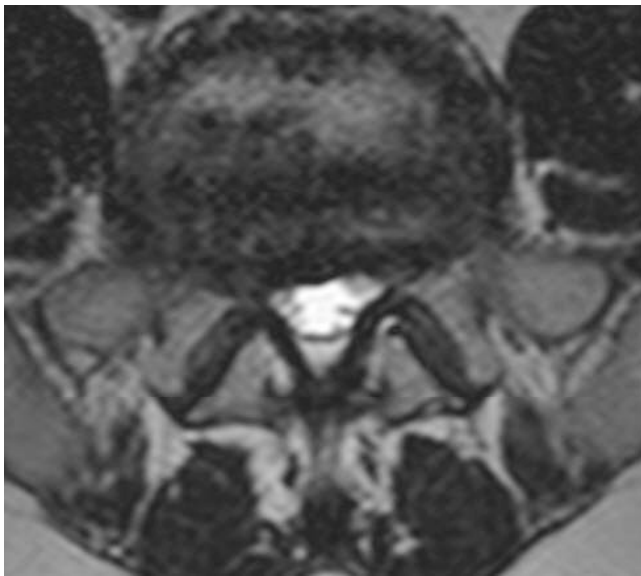

d

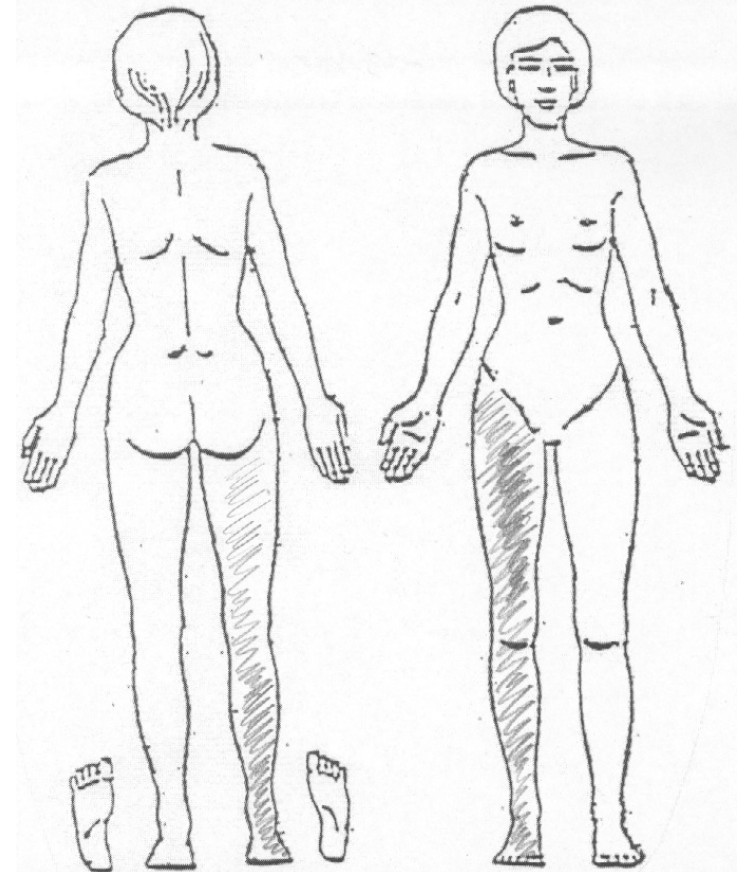

Supplement: MOESM7 [file 9506770]
